# Supplementary figures and images for: Design of a Tension Infiltrometer with Automated Data Collection Using a Supervisory Control and Data Acquisition System
Source: MDPI journal article supplement (doi:10.3390/s23239489), 2023-11-29

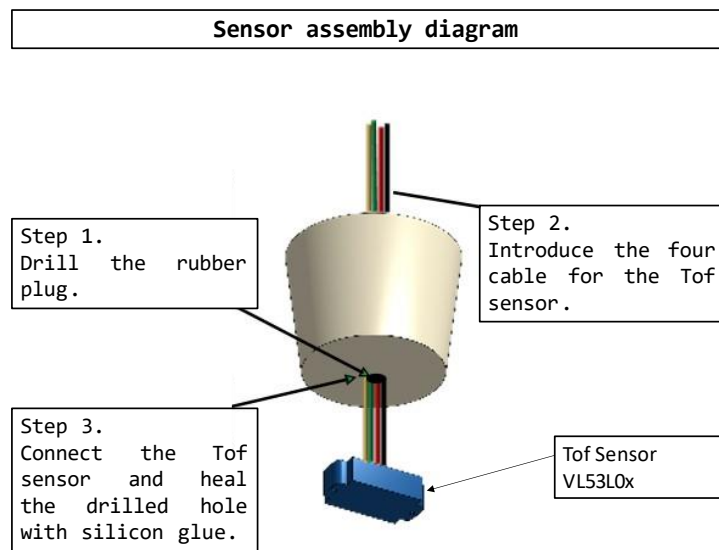

**Figure S1.** Sensor assembly.

Supplement: s1 [file s1]
